# Supplementary material for: Facile one-pot synthesis of a waste copper phthalocyanine-derived nanocomposite for efficiently removing dyes from wastewater
Source: Royal Society of Chemistry journal article supplement (doi:10.1039/d3nj05351b), 2024-01-01
Supplement: d3nj05351b1.pdf [file d3nj05351b1.pdf]

## Supporting Information

**Facile One-pot synthesis of waste copper phthalocyanine-derived nanocomposite for efficiently removing dyes from wastewater.**

Munazza Munshi<sup>a†</sup>, Tanzila Khan<sup>a†</sup>, Madhuri Bhakare<sup>a†</sup>, Ankita Kadam<sup>a</sup>, Surajit Some<sup>a\*</sup>

<sup>a</sup>Department of Speciality Chemicals Technology, Institute of Chemical Technology, Mumbai-400019, India.

\*Corresponding Author

E-mail: [sr.some@ictmumbai.edu.in](mailto:sr.some@ictmumbai.edu.in)

Present Address

Department of Speciality Chemicals Technology, Institute of Chemical Technology, Matunga, Mumbai, 400019, India

## Table of Contents

| Section   | Title                                                                                                                    | Page No |
|-----------|--------------------------------------------------------------------------------------------------------------------------|---------|
| Fig. S-1  | Structure of Copper Phthalocyanine dye.                                                                                  | 4       |
| Fig. S-2  | Digital image of AC/Ppy/CuPc nanocomposite.                                                                              | 4       |
| Fig. S-3  | Chem Draw representation of the dyes that has been efficiently removed.                                                  | 5       |
| Fig. S-4  | Particle size distribution of AC/Ppy/CuPc nanocomposite                                                                  | 5       |
| Fig. S-5  | N <sub>2</sub> adsorption-desorption isotherm and pore size distribution curve of AC/Ppy/CuPc                            | 6       |
| Fig. S-6  | Effect of contact time on the adsorption of MB and AOG II dye onto AC/Ppy/CuPc nanocomposite                             | 6       |
| Fig. S-7  | Pictorial representation of before and after 35 mins of contact time of MB, MG and AOG II with AC/Ppy/CuPc nanocomposite | 7       |
| Fig. S-8  | Percent adsorption of MB using AC, Ppy, CuPc and AC/Ppy/CuPc adsorbents                                                  | 7       |
| Fig. S-9  | Recyclability data (%) of MB on AC/Ppy/CuPc composite during 7 adsorption cycles.                                        | 8       |
| Fig. S-10 | Effect of ions on the removal of MB, MG, and AOG II dyes using AC/Ppy/CuPc nanocomposite, respectively.                  | 8       |
| Table 1   | Toxic effects and application of dyes                                                                                    | 9       |
| Table 2   | Pseudo first and second order kinetics models for the adsorption of MB dye on AC/Ppy/CuPc at 50°C.                       | 10      |
| Table 3   | Pseudo first and second order kinetics models for the adsorption of MG dye on AC/Ppy/CuPc                                | 10      |

|         |                                                                                                              |    |
|---------|--------------------------------------------------------------------------------------------------------------|----|
|         | at 50°C.                                                                                                     |    |
| Table 4 | Pseudo first and second-order kinetics models<br>for the adsorption of AOG II dye on<br>AC/Ppy/CuPc at 50°C. | 10 |
| Table 5 | Removal capacity of various adsorbents for<br>MB, MG and AOG II                                              | 11 |

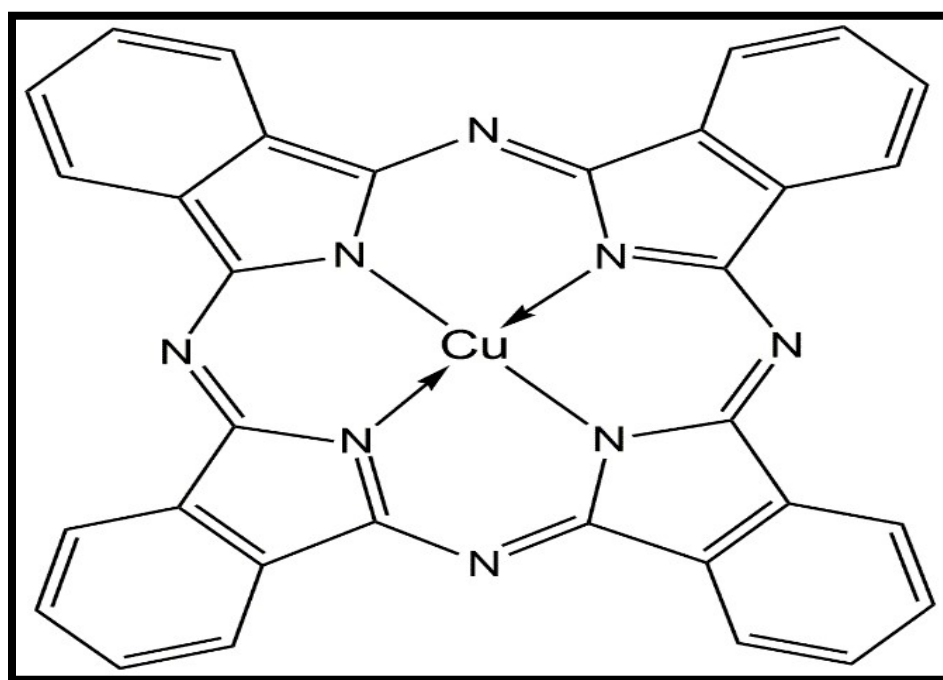

**Fig.S1.** Structure of Copper Phthalocyanine dye.

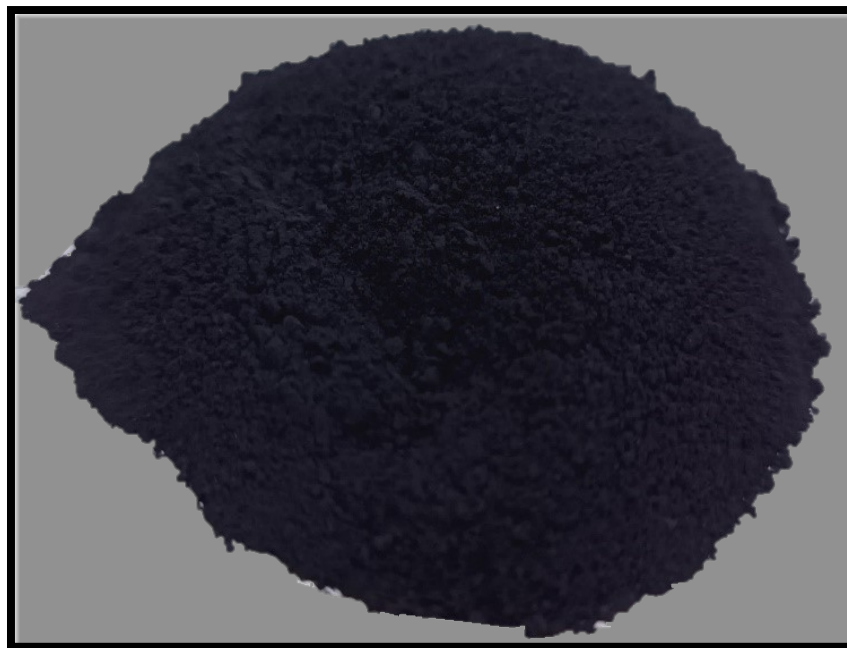

**Fig.S2.** Digital image of AC/Ppy/CuPC nanocomposite

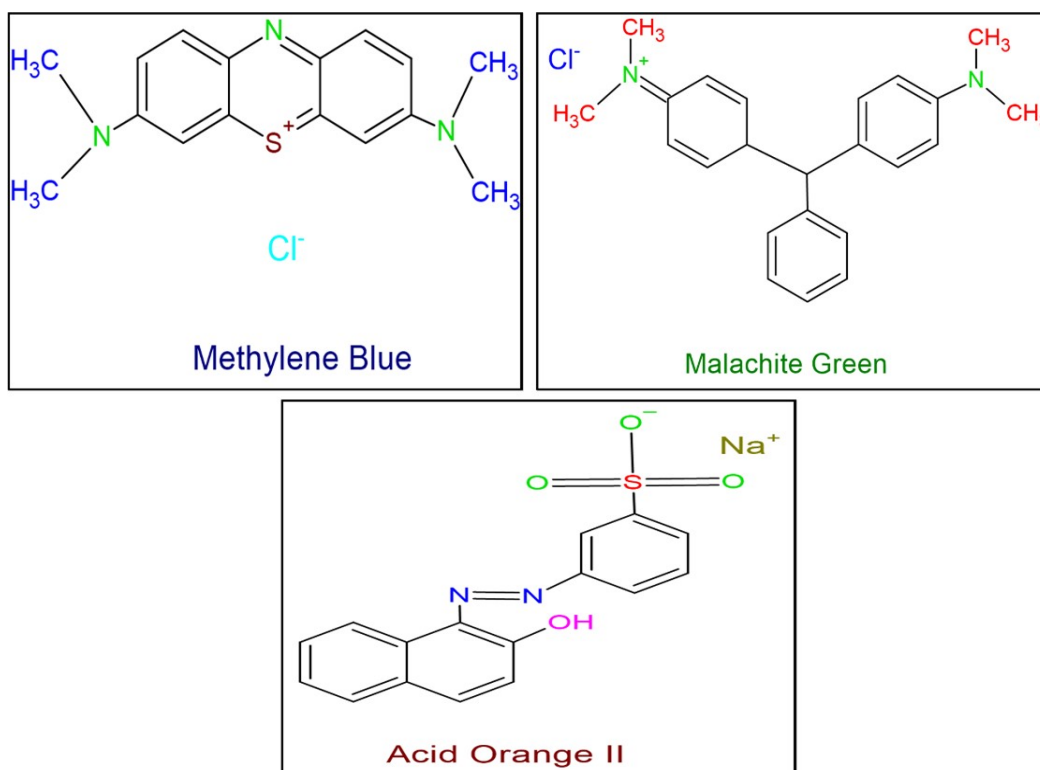

**Fig.S3** Chem draws a representation of the dyes that have been efficiently removed.

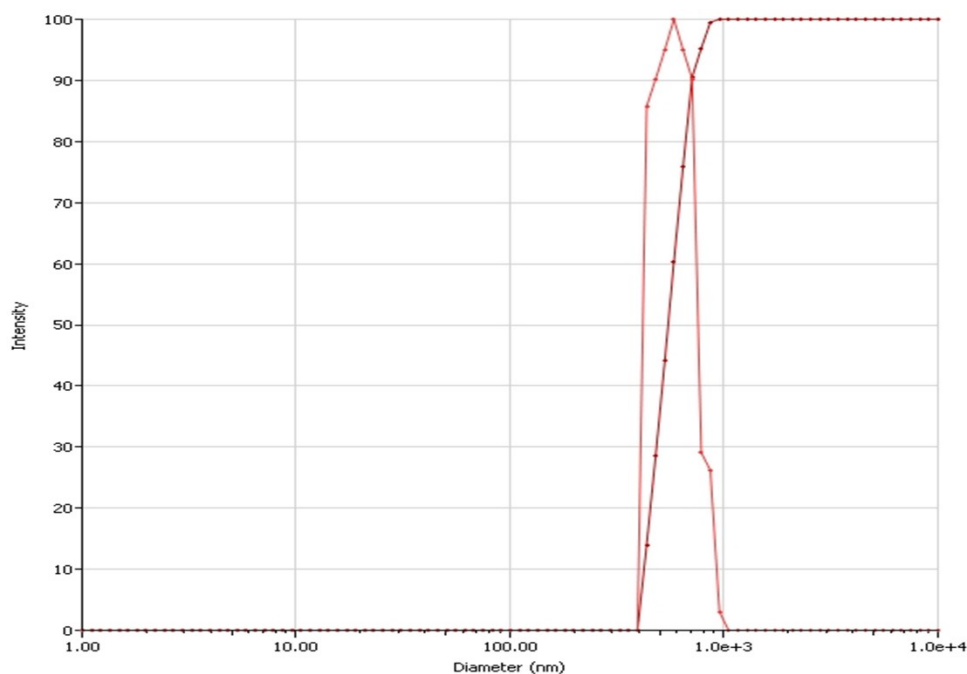

**Fig.S4.** Particle size distribution of AC/Ppy/CuPc nanocomposite

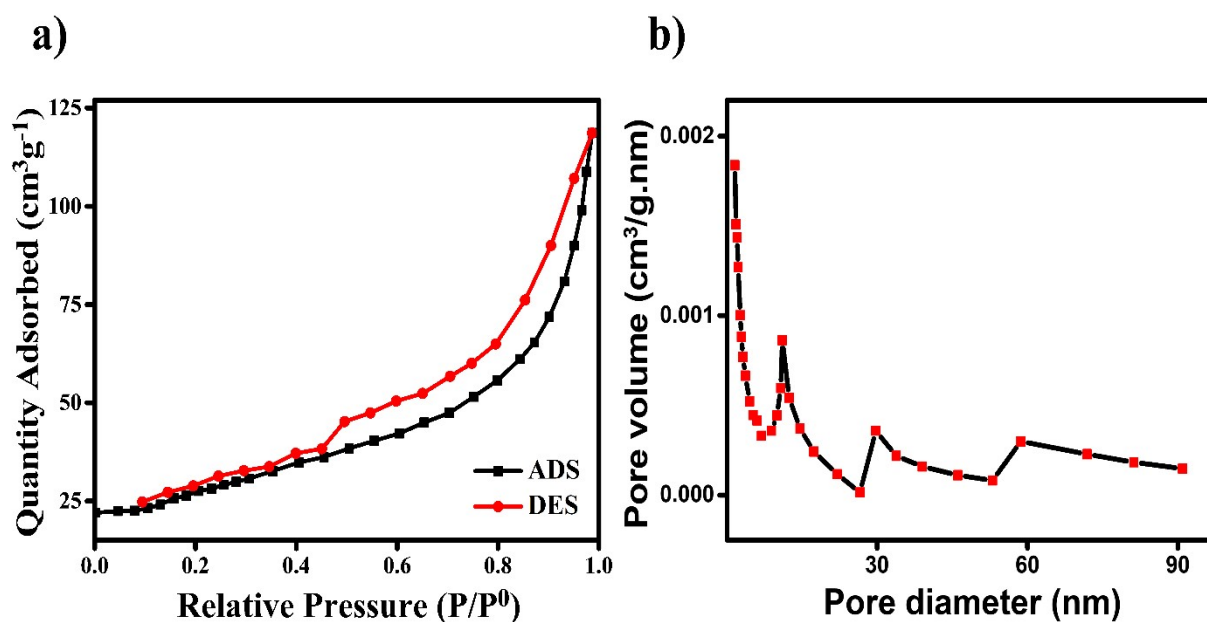

**Fig.S5. a)** N<sub>2</sub> adsorption-desorption isotherm and **b)** Pore size distribution curve of AC/Ppy/CuPc

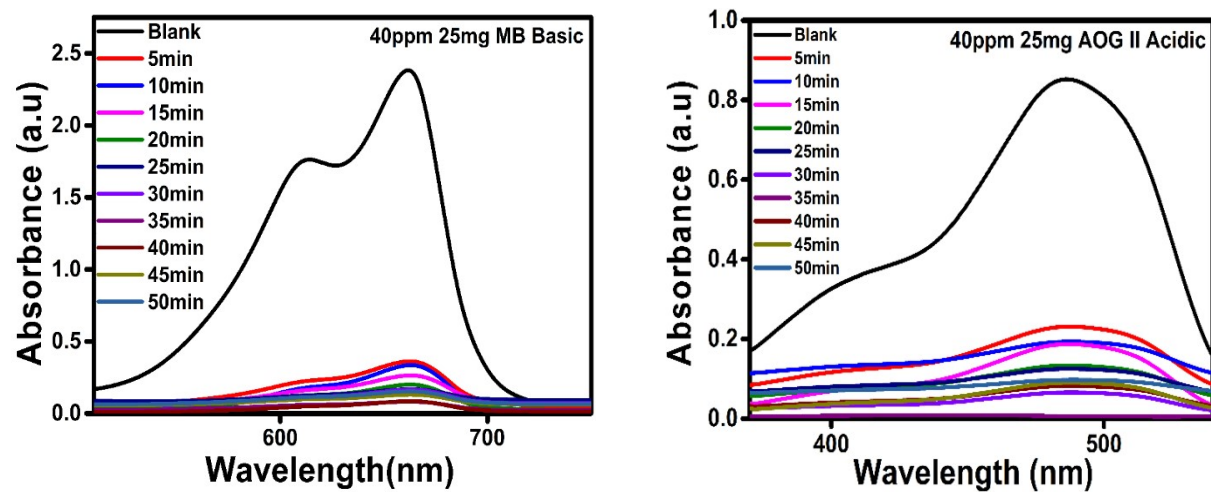

**Fig S6.** Effect of contact time on the adsorption of MB and AOG II dye onto AC/Ppy/CuPc nanocomposite: Mass of adsorbent = 25 mg, Volume of MB solution = 50 ml, Initial dye Concentration = 40 ppm, Temperature = 50°C

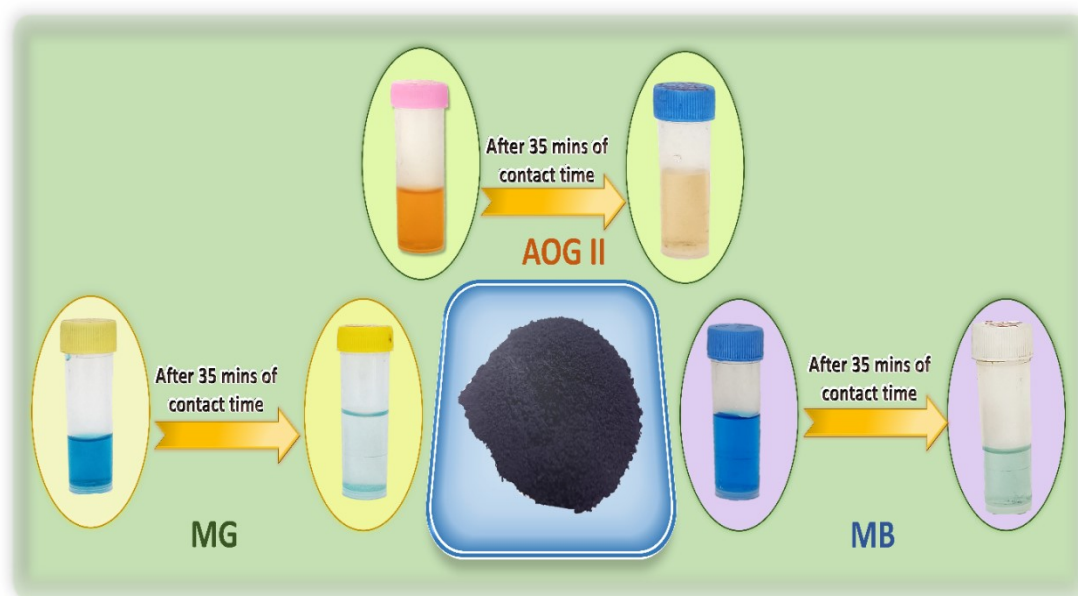

**Fig.S7.** Pictorial representation of before and after 35 mins of contact time of MB, MG and AOG II with AC/Ppy/CuPc nanocomposite

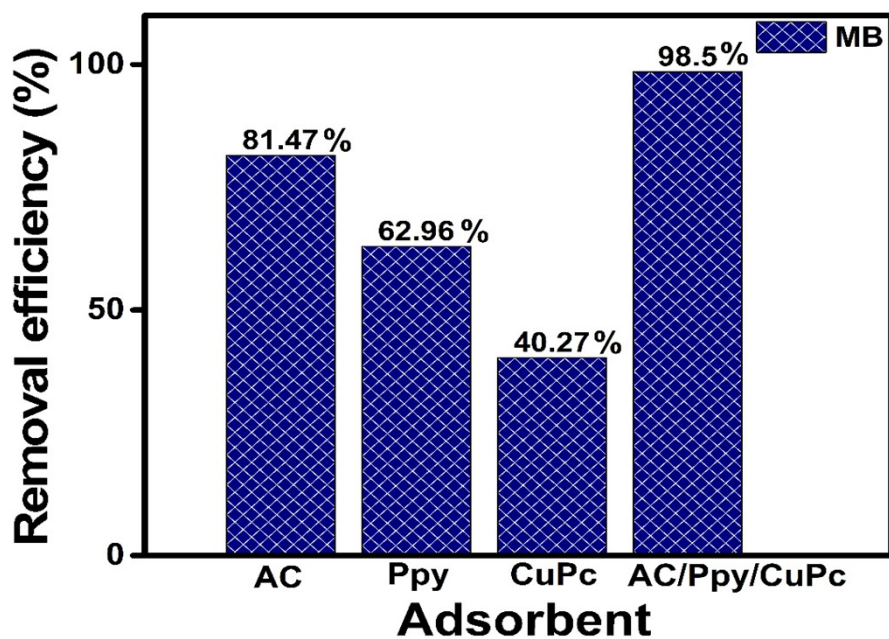

**Fig S8.** Percent adsorption of MB using AC, Ppy, CuPc and AC/Ppy/CuPc adsorbents

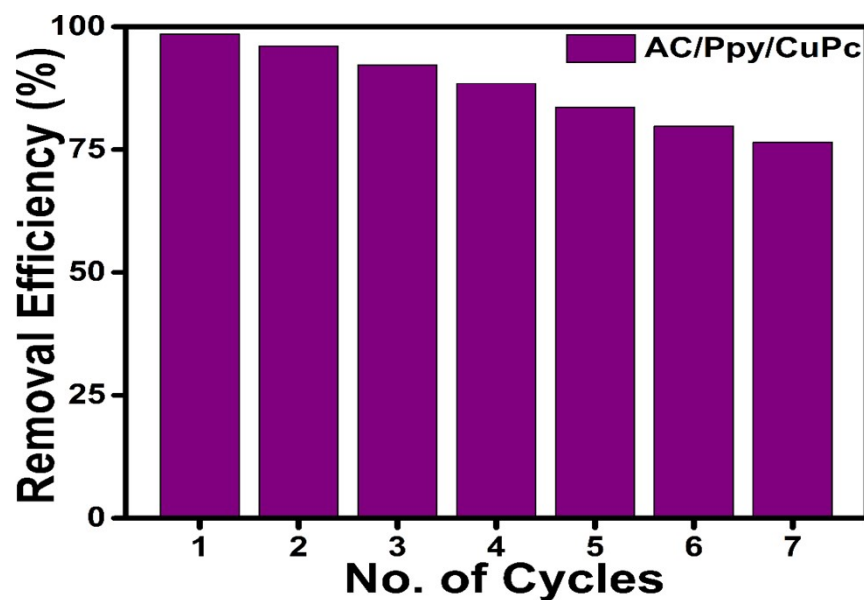

**Fig S9.** Recyclability data (%) of MB on AC/Ppy/CuPc composite during 7 adsorption cycles.

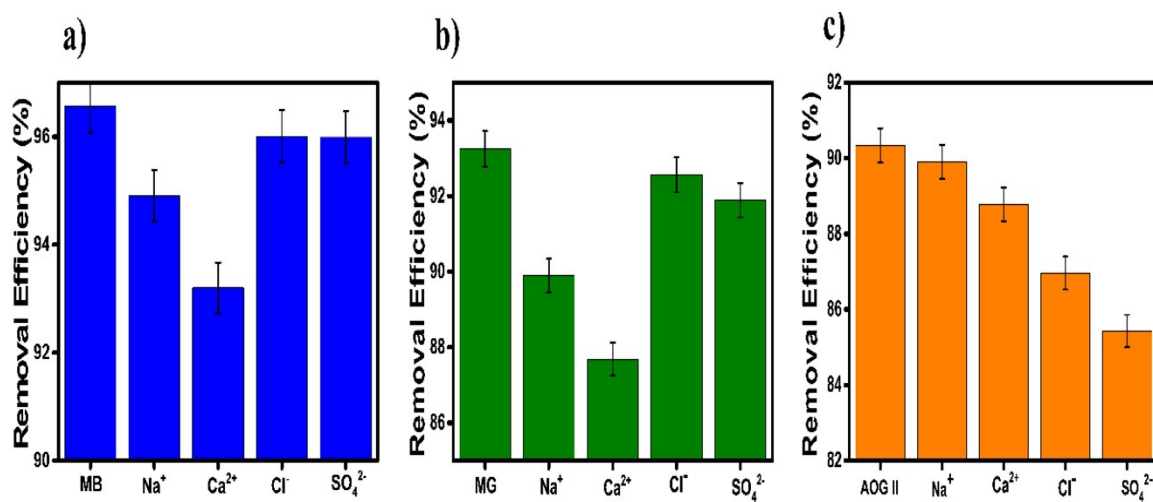

**Fig S10 a), b), and c)** effect of ions on the removal of MB, MG, and AOG II dyes using AC/Ppy/CuPc nanocomposite, respectively.



**Table S1.** Toxic effects and application of dyes.

| Type of dye | Name of dye     | Toxic effects                                                                                                                                                               | Application                                                                                                                                                                                       | Ref |
|-------------|-----------------|-----------------------------------------------------------------------------------------------------------------------------------------------------------------------------|---------------------------------------------------------------------------------------------------------------------------------------------------------------------------------------------------|-----|
| Anionic     | Acid orange II  | Upper respiratory tract irritations; severe headaches, dizziness, nausea, and loss of bone marrow leading to anaemia. It is carcinogenic in nature and can lead to tumours. | It is extensively used for dyeing a variety of materials such as nylon, aluminium, Detergents, cosmetics, wool, and silk.                                                                         | [1] |
|             | Methylene blue  | Eye burn, breathing problems with a burning sensation, vomiting, nausea, and profuse sweating                                                                               | Colouring of silk, cotton, and wood.                                                                                                                                                              | [2] |
| Cationic    | Malachite green | Damages the kidneys, heart, and liver<br>Lesions on the eyes, skin, lungs, and bones.                                                                                       | Colouring cotton, paper, jute, silk, wool, acrylic, and leather products. It is also used for colouring food agents, food additives, medicinal disinfectants, commercial fish-hatching industries | [2] |

**Table S2:** Pseudo first and second order kinetics models for the adsorption of MB dye on AC/Ppy/CuPc at 50°C.

| <b>Concentration<br/>(ppm)</b> | <b>Pseudo-first order</b>   |                      |                      | <b>Pseudo-second order</b>  |                      |                      |
|--------------------------------|-----------------------------|----------------------|----------------------|-----------------------------|----------------------|----------------------|
|                                | <b>q<sub>e</sub> (mg/g)</b> | <b>k<sub>1</sub></b> | <b>R<sup>2</sup></b> | <b>q<sub>e</sub> (mg/g)</b> | <b>k<sub>1</sub></b> | <b>R<sup>2</sup></b> |
| <b>20</b>                      | 0.3250                      | 0.1248               | 0.0842               | 53.4759                     | 0.0168               | 0.9986               |
| <b>30</b>                      | 1.8593                      | 0.0083               | 0.0125               | 55.8659                     | 0.1104               | 0.9920               |
| <b>40</b>                      | 0.0288                      | 0.1538               | 0.4775               | 85.4700                     | 0.0092               | 0.9960               |
| <b>50</b>                      | 0.0085                      | 0.1605               | 0.3393               | 60.2409                     | 0.0231               | 0.9638               |

**Table S3.** Pseudo first and second order kinetics models for the adsorption of MG dye on AC/Ppy/CuPc at 50°C.

| <b>Concentration<br/>(ppm)</b> | <b>Pseudo-first order</b>   |                      |                      | <b>Pseudo-second order</b>  |                      |                      |
|--------------------------------|-----------------------------|----------------------|----------------------|-----------------------------|----------------------|----------------------|
|                                | <b>q<sub>e</sub> (mg/g)</b> | <b>k<sub>1</sub></b> | <b>R<sup>2</sup></b> | <b>q<sub>e</sub> (mg/g)</b> | <b>k<sub>1</sub></b> | <b>R<sup>2</sup></b> |
| <b>20</b>                      | 6.0325                      | 0.0336               | 0.103                | 34.72222                    | 0.095338             | 0.999                |
| <b>30</b>                      | 0.4472                      | 0.1075               | 0.0724               | 64.10256                    | 0.017383             | 0.999                |
| <b>40</b>                      | 0.1017                      | 0.1409               | 0.2839               | 47.16981                    | 0.007214             | 0.9857               |
| <b>50</b>                      | 0.5787                      | 0.0852               | 0.0521               | 34.01361                    | 0.036625             | 0.9917               |

**Table S4:** Pseudo first and second-order kinetics models for the adsorption of AOG II dye on AC/Ppy/CuPc at 50°C.

| <b>Concentration<br/>(ppm)</b> | <b>Pseudo-first order</b>   |                      |                      | <b>Pseudo-second order</b>  |                      |                      |
|--------------------------------|-----------------------------|----------------------|----------------------|-----------------------------|----------------------|----------------------|
|                                | <b>q<sub>e</sub> (mg/g)</b> | <b>k<sub>1</sub></b> | <b>R<sup>2</sup></b> | <b>q<sub>e</sub> (mg/g)</b> | <b>k<sub>1</sub></b> | <b>R<sup>2</sup></b> |
| <b>20</b>                      | 0.8974                      | -0.1082              | 0.2684               | 36.9004                     | 0.0556               | 0.9652               |
| <b>30</b>                      | 0.00017                     | 0.3740               | 0.5206               | 71.94                       | 0.0070               | 0.9756               |
| <b>40</b>                      | 0.0326                      | 0.1568               | 0.4604               | 90.0901                     | 0.0067               | 0.9951               |
| <b>50</b>                      | 0.0087                      | 0.1515               | 0.4203               | 84.7457                     | 0.0070               | 0.9951               |

**Table S5.** Removal capacity of various adsorbents for MB, MG and AOG II

| <b>Composite</b>                                                                | <b>Conc<br/>(mg/L)</b> | <b>Dose<br/>(g)</b> | <b>Volume<br/>(ml)</b> | <b>Percent<br/>efficiency<br/>(%)</b> | <b>q<sub>e</sub><br/>(mg/g)</b> | <b>Dyes</b> | <b>Contact<br/>time<br/>(mins)</b> | <b>Ref</b>    |
|---------------------------------------------------------------------------------|------------------------|---------------------|------------------------|---------------------------------------|---------------------------------|-------------|------------------------------------|---------------|
| PPy-coated<br>cotton textile                                                    | 50                     | 0.05                | 50                     | 96                                    | 6.83                            | MB          | 1440                               | (3)           |
| (CuPc/Fe <sub>3</sub> O)                                                        | 50                     | 0.05                | 50                     | 78.7                                  | -                               | MB          | 120                                | (4)           |
| Ball clay –<br>Manganese<br>dioxide<br>nanocompos<br>ite                        | 10                     | 0.8                 | 50                     | 82                                    | 58.47                           | MG          | 70                                 | (5)           |
| Activated<br>carbon<br>produced<br>from<br>Parthenium<br>hysterophoru<br>s stem | 100                    | 2                   | 100                    | 91                                    | 11.37                           | MB          | 100                                | (6)           |
| AC/PPY/<br>CuPc                                                                 | 40                     | 0.025               | 50                     | 98.50                                 | 135.13                          | MB          | 35                                 | This<br>study |
|                                                                                 | 30                     |                     |                        | 95.85                                 | 94.34                           | MG          |                                    |               |
|                                                                                 | 40                     |                     |                        | 93.67                                 | 106.3                           | AOG II      |                                    |               |

## References:

1. Joaquim Pedro Silva, Sónia Sousa, José Rodrigues, Helena Antunes, John J. Porter, Isolina Gonçalves, Suzana Ferreira-Dias, Adsorption of acid orange 7 dye in aqueous solutions by spent brewery grains, *Separation and Purification Technology*, 2004, 40 (3), 309-315, <https://doi.org/10.1016/j.seppur.2004.03.010>.
2. Mishra, Sneha Prabha, Amiya Ranjan Patra, and Shubhalaxmi Das. "Methylene blue and malachite green removal from aqueous solution using waste activated carbon." *Biointerface Research in Applied Chemistry*, 2021, 11(1), 7410-7421. <https://doi.org/10.33263/BRIAC111.74107421>
3. Ayad, M. M., Amer, W. A., Zaghlol, S., Minisy, I. M., Bober, P., & Stejskal, J. Polypyrrole-coated cotton textile as adsorbent of methylene blue dye. *Chemical Papers*, 2018, 72, 1605-1618. <https://doi.org/10.1007/s11696-018-0442-6>
4. Wang, Kun, Li Na Dai, He Nan Li, Chang Ju, Wei Liu, and Yi Cong Jin. "Copper Phthalocyanine/Fe<sub>3</sub>O<sub>4</sub> Nanocomposite for Photocatalytic Degradation of Methylene Blue under Visible Irradiation." *Advanced Materials Research*, 2011, 239–242, 2183–2186. <https://doi.org/10.4028/www.scientific.net/amr.239-242.2183>.
5. Thirumoorthy K, Krishna S K, Removal of cationic and anionic dyes from aqueous phase by Ball clay – Manganese dioxide nanocomposites, *Journal of Environmental Chemical Engineering*, 2020, 8 (1), 2213-3437 <https://doi.org/10.1016/j.jece.2019.103582>.
6. K. Yogesh Kumar, H.B. Muralidhara, Y. Arthoba Nayaka, J. Balasubramanyam, H. Hanumanthappa, Low-cost synthesis of metal oxide nanoparticles and their application in adsorption of commercial dye and heavy metal ion in aqueous solution, *Powder Technology*, 2013, 246, 125-136, <https://doi.org/10.1016/j.powtec.2013.05.017>.
